# Supplementary material for: A New Role of NAP1L1 in Megakaryocytes and Human Platelets
Source: Int J Mol Sci. 2022 Nov 24;23(23):14694. doi: 10.3390/ijms232314694 (PMC9737020; doi:10.3390/ijms232314694)
Supplement: Supplementary file 1 [file ijms-23-14694-s001.zip › ijms-1996450-supplementary.pdf]

**Supplemental Figure S1. PLT activation does not change NAP1L1 expression pattern.**

RNA from freshly isolated PLTs at baseline (BL) and after incubation on immobilized fibrinogen (Fib) and stimulated with thrombin (Thr) was isolated and *NAP1L1* mRNA expression was evaluated by PCR. RT reaction omitting the enzyme are indicated by -RT. In addition, DNase treated samples are shown, and the -PCR lane demonstrates the negative control for the PCR reaction. Lanes labeled with M are indicating the marker lane. This figure is representative of 3 independent experiments. PCR-products are highlighted by yellow arrows.

**Supplemental Figure S2. MKs undergoing anaphase showed reduced NAP1L1**

**association with condensed chromosomes.** CD34<sup>+</sup>-derived MKs were fixed in suspension, spun on coverslips, and then incubated with an antibody against NAP1L1 (yellow, top right panel) or an IgG control (top left), followed by co-staining for actin (phalloidin, green), sialic acids (WGA, magenta), and nuclei (40,6-diamidino-2-phenylindole, DAPI, blue), as shown in the bottom panels. Scale bars = 20  $\mu$ m. This figure is representative of n=7 independent experiments.

**Supplemental Figure S3. NAP1L1 - PDC-E2 interaction and pyruvate dehydrogenase**

**complex activity are increased in MKs when exposed to agonist being present during sepsis. (A)** Bar graph showing the fold increase for LPS treated MKs over non-treated MKs of PDC-E2 interacting with NAP1L1. Grey bar represents normalized PDC-E2 co-IP

results for non-treated cells; non-filled bar shows increase for PDC-E2 detected after co-IP using LPS-treated cells. This figure is representative of n=6 independent experiments. **(B)**

Pyruvate dehydrogenase complex activity assay was performed on MKs (day 13) untreated (noTx) or exposed to LPS. Plot depicts mean optical signal $\pm$ SEM. This figure is representative of n=3 independent experiments.
